# Supplementary material for: Improvement of proteolytic efficiency towards low-level proteins by an antifouling surface of alumina gel in a microchannel
Source: Royal Society of Chemistry journal article supplement (doi:10.1039/c0lc00016g), 2010-01-01
Supplement: c0lc00016g.pdf [file c0lc00016g.pdf]

## Supporting Information

### Improvement of proteolytic efficiency towards low-level proteins by an antifouling surface of alumina gel in a microchannel

Yun Liu,<sup>a</sup> Huixiang Wang,<sup>a</sup> Qingping Liu,<sup>a</sup> Haiyun Qu,<sup>b</sup> Baohong Liu,<sup>a</sup> Pengyuan Yang\*<sup>a</sup>

<sup>a</sup> Department of Chemistry and Institute of Biomedical Sciences, Fudan University, Shanghai 200433, China. Fax:86-21-65641740; Tel: 86-21-65642009 Email:pyyang@fudan.edu.cn

<sup>b</sup> Shanghai Institute of Ceramics, Chinese Academy of Sciences, Shanghai 200050, P. R. China. Fax:86-21-52413016Tel:86-21-52411059; E-mail: quhaiyun\_sh@yahoo.com.cn

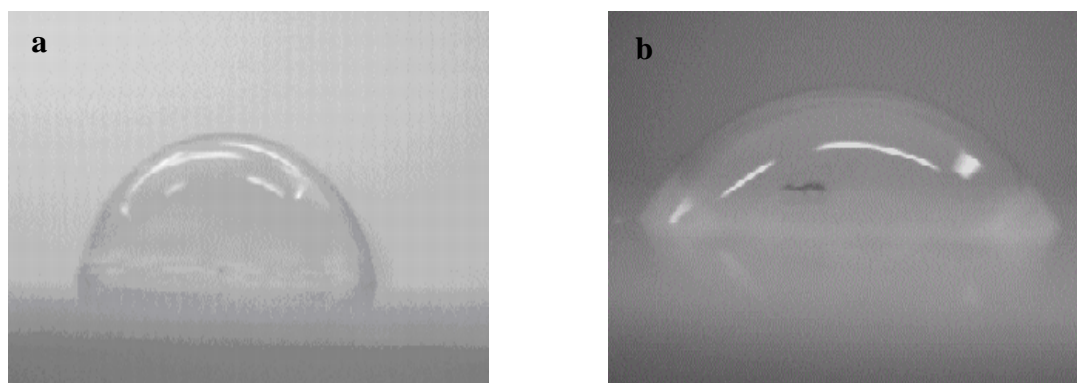

**Figure SI-1** Contact angle determination of PET surface.(a) micrograph of water droplet on original PET surface; (b) micrograph of water droplet on NaOH hydrolyzed PET surface.

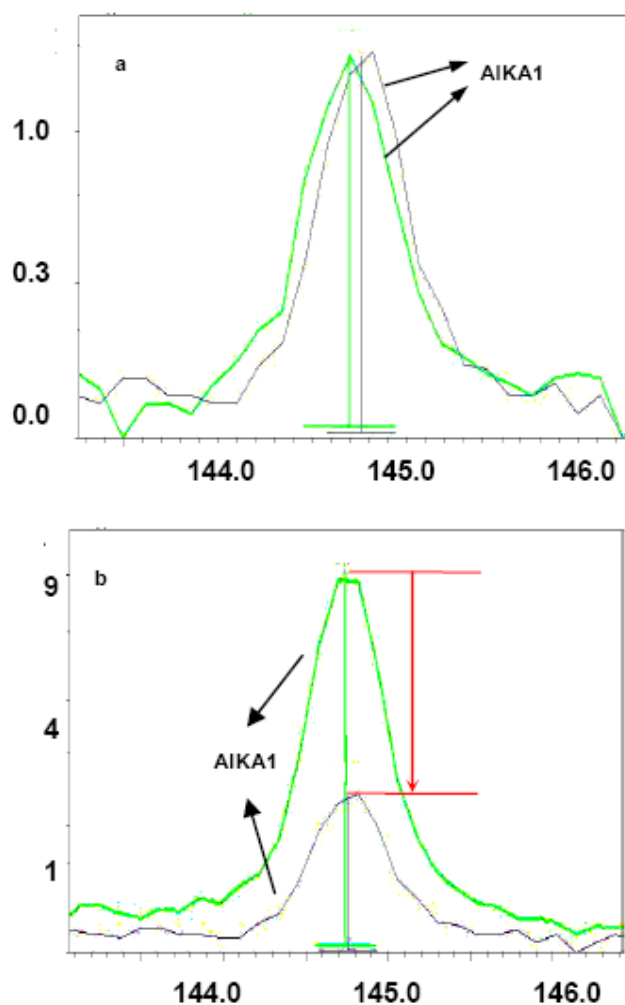

**Figure SI-2** (a) The X-ray fluorescence spectrometry from hydrolyzed PET surface modified by Al<sub>2</sub>O<sub>3</sub> sol-gel (b) The X-ray fluorescence spectrometry from unhydrolyzed PET surface dropped by Al<sub>2</sub>O<sub>3</sub> sol-gel. Green line: before washed in PBS buffer; Blue line: after washed in PBS buffer.

**Table SI-1** The detailed identification information of proteins from the extracts of normal mouse liver using Al<sub>2</sub>O<sub>3</sub>-derived enzymatic microreactor

| protein               | AANum | pI       | Mw       | protein probability | percent coverage | num unique peps | tot indep spectra |
|-----------------------|-------|----------|----------|---------------------|------------------|-----------------|-------------------|
| sp 009131 GSTO1_MOUSE | 240   | 6.910063 | 27497.62 | 1                   | 17.5             | 4               | 9                 |
| sp 035295 PURB_MOUSE  | 324   | 5.340027 | 33901.42 | 1                   | 12               | 2               | 3                 |
| sp 054962 BAF_MOUSE   | 89    | 5.790038 | 10102.59 | 1                   | 40.4             | 3               | 4                 |
| sp 055125 NIPS1_MOUSE | 284   | 9.480122 | 33363.22 | 1                   | 12.3             | 4               | 5                 |
| sp 055131 SEPT7_MOUSE | 436   | 8.720104 | 50549.93 | 1                   | 8                | 2               | 5                 |
| sp P02088 HBB1_MOUSE  | 147   | 7.120068 | 15840.17 | 1                   | 32.7             | 4               | 7                 |
| sp P07309 TTHY_MOUSE  | 147   | 5.760037 | 15775.92 | 1                   | 27.2             | 3               | 4                 |
| sp P07724 ALBU_MOUSE  | 608   | 5.740036 | 68692.6  | 1                   | 17.6             | 11              | 25                |
| sp P08003 PDIA4_MOUSE | 638   | 5.130023 | 71973.5  | 1                   | 22.9             | 9               | 17                |
| sp P08228 SODC_MOUSE  | 154   | 6.020043 | 15942.67 | 1                   | 46.1             | 7               | 14                |
| sp P09405 NUCL_MOUSE  | 707   | 4.680012 | 76723.28 | 1                   | 4.2              | 2               | 2                 |
| sp P09528 FRIH_MOUSE  | 182   | 5.530032 | 21066.6  | 1                   | 15.4             | 3               | 4                 |
| sp P10853 H2B1F_MOUSE | 126   | 10.31014 | 13936.16 | 1                   | 11.9             | 3               | 4                 |
| sp P11352 GPX1_MOUSE  | 200   | 6.730059 | 22179.25 | 1                   | 53.7             | 9               | 17                |
| sp P12710 FABPL_MOUSE | 127   | 8.580101 | 14245.55 | 1                   | 33.9             | 5               | 10                |
| sp P12787 COX5A_MOUSE | 146   | 6.070044 | 16101.47 | 1                   | 17.8             | 5               | 8                 |
| sp P14211 CALR_MOUSE  | 416   | 4.330004 | 47994.6  | 1                   | 22.4             | 5               | 8                 |
| sp P15105 GLNA_MOUSE  | 373   | 6.630057 | 42119.68 | 1                   | 7.8              | 2               | 3                 |
| sp P16015 CAH3_MOUSE  | 260   | 6.890063 | 29366.28 | 1                   | 39.6             | 8               | 16                |
| sp P17742 PPIA_MOUSE  | 164   | 7.730082 | 17971.34 | 1                   | 17.1             | 2               | 4                 |
| sp P18760 COF1_MOUSE  | 166   | 8.210093 | 18559.54 | 1                   | 27.1             | 2               | 4                 |
| sp P24270 CATA_MOUSE  | 527   | 7.720082 | 59765.36 | 1                   | 25.6             | 10              | 21                |
| sp P24369 PIIB_MOUSE  | 216   | 9.550123 | 23713.48 | 1                   | 16.2             | 3               | 4                 |
| sp P25444 RS2_MOUSE   | 293   | 10.25014 | 31231.32 | 1                   | 5.8              | 2               | 3                 |
| sp P25688 URIC_MOUSE  | 303   | 8.480099 | 35039.19 | 1                   | 12.9             | 3               | 6                 |
| sp P26443 DHE3_MOUSE  | 558   | 8.050089 | 61336.87 | 1                   | 4.5              | 2               | 5                 |
| sp P26645 MARCS_MOUSE | 309   | 4.340004 | 29661.3  | 1                   | 17.2             | 4               | 10                |
| sp P27773 PDIA3_MOUSE | 505   | 5.88004  | 56678.46 | 1                   | 37.2             | 18              | 33                |
| sp P29341 PABP1_MOUSE | 636   | 9.470121 | 70642.73 | 1                   | 7.7              | 4               | 9                 |
| sp P32020 NLTP_MOUSE  | 547   | 7.150069 | 59125.73 | 1                   | 11               | 8               | 16                |
| sp P32067 LA_MOUSE    | 415   | 9.770128 | 47756.5  | 1                   | 6.7              | 2               | 4                 |
| sp P47199 QOR_MOUSE   | 331   | 8.170092 | 35268.59 | 1                   | 15.7             | 3               | 4                 |
| sp P48758 CBR1_MOUSE  | 277   | 8.5301   | 30641.21 | 1                   | 37.2             | 7               | 14                |
| sp P52196 THTR_MOUSE  | 297   | 7.700081 | 33465.91 | 1                   | 14.5             | 3               | 8                 |
| sp P54869 HMCS2_MOUSE | 508   | 8.640102 | 56822.82 | 1                   | 11.4             | 4               | 5                 |
| sp P62245 RS15A_MOUSE | 130   | 10.14014 | 14839.5  | 1                   | 28.5             | 4               | 8                 |
| sp P62270 RS18_MOUSE  | 152   | 10.98016 | 17718.67 | 1                   | 28.3             | 4               | 8                 |
| sp P62960 YBOX1_MOUSE | 322   | 9.870131 | 35729.97 | 1                   | 14.9             | 2               | 4                 |
| sp P70296 PEBP1_MOUSE | 187   | 5.190024 | 20830.44 | 1                   | 25.7             | 4               | 4                 |
| sp P97351 RS3A_MOUSE  | 264   | 9.750128 | 29884.86 | 1                   | 11.4             | 2               | 4                 |
| sp P97855 G3BP1_MOUSE | 465   | 5.400029 | 51828.8  | 1                   | 13.8             | 4               | 9                 |
| sp P99027 RLA2_MOUSE  | 115   | 4.420006 | 11650.91 | 1                   | 61.7             | 7               | 13                |
| sp Q03265 ATPA_MOUSE  | 553   | 9.220116 | 59752.64 | 1                   | 9.8              | 5               | 6                 |
| sp Q05816 FABP5_MOUSE | 135   | 6.130045 | 15137.4  | 1                   | 8.9              | 2               | 4                 |
| sp Q5FW57 GLYAL_MOUSE | 296   | 7.65008  | 34108.37 | 1                   | 35.5             | 11              | 22                |
| sp Q61207 SAP_MOUSE   | 557   | 5.060021 | 61422.24 | 1                   | 4.5              | 2               | 3                 |
| sp Q61646 HPT_MOUSE   | 347   | 5.88004  | 38752.32 | 1                   | 8.4              | 3               | 6                 |
| sp Q61937 NPM_MOUSE   | 292   | 4.610011 | 32560.05 | 1                   | 24.3             | 7               | 15                |
| sp Q64433 CH10_MOUSE  | 102   | 7.900086 | 10962.7  | 1                   | 42.2             | 4               | 7                 |
| sp Q6ZWN5 RS9_MOUSE   | 194   | 10.65015 | 22591.43 | 1                   | 9.8              | 2               | 4                 |

|                       |      |          |          |        |      |    |    |
|-----------------------|------|----------|----------|--------|------|----|----|
| sp Q78JT3 3HAO_MOUSE  | 286  | 6.090044 | 32804.31 | 1      | 19.2 | 5  | 8  |
| sp Q8C196 CPSM_MOUSE  | 1500 | 6.480053 | 164617.2 | 1      | 10.1 | 11 | 17 |
| sp Q8K2B3 DHSA_MOUSE  | 664  | 7.060067 | 72585.46 | 1      | 9.5  | 5  | 7  |
| sp Q8QZT1 THIL_MOUSE  | 424  | 8.700104 | 44816.14 | 1      | 7.1  | 2  | 3  |
| sp Q8VC28 AK1CD_MOUSE | 323  | 6.660058 | 37057.8  | 1      | 26   | 6  | 12 |
| sp Q8VI36 PAXI_MOUSE  | 591  | 5.670035 | 64476.39 | 1      | 4.4  | 2  | 4  |
| sp Q91X83 METK1_MOUSE | 396  | 5.510031 | 43508.66 | 1      | 7.6  | 3  | 7  |
| sp Q921I1 TRFE_MOUSE  | 697  | 6.940064 | 76723.88 | 1      | 4    | 2  | 3  |
| sp Q923D2 BLVRB_MOUSE | 206  | 6.480053 | 22197.33 | 1      | 36.9 | 4  | 10 |
| sp Q99020 ROAA_MOUSE  | 285  | 7.680081 | 30831.27 | 1      | 11.2 | 2  | 6  |
| sp Q99J99 THTM_MOUSE  | 297  | 6.100045 | 33023.19 | 1      | 33   | 8  | 19 |
| sp Q99KB8 GLO2_MOUSE  | 260  | 6.490054 | 28901.02 | 1      | 20.8 | 3  | 5  |
| sp Q99PL5 RRBP1_MOUSE | 1605 | 9.350119 | 172878.2 | 1      | 9.1  | 12 | 19 |
| sp Q9CPQ1 COX6C_MOUSE | 76   | 10.13014 | 8469     | 1      | 19.7 | 2  | 3  |
| sp Q9CPU0 LGUL_MOUSE  | 184  | 5.240025 | 20809.6  | 1      | 15.2 | 2  | 3  |
| sp Q9CQB2 CP014_MOUSE | 160  | 6.730059 | 17871.06 | 1      | 19.4 | 2  | 3  |
| sp Q9CRB9 CHCH3_MOUSE | 227  | 8.5501   | 26334.52 | 1      | 11   | 3  | 4  |
| sp Q9CWS0 DDAH1_MOUSE | 285  | 5.630034 | 31380.98 | 1      | 7    | 2  | 4  |
| sp Q9CY58 PAIRB_MOUSE | 407  | 8.600101 | 44714.14 | 1      | 7.4  | 2  | 4  |
| sp Q9D819 IPYR_MOUSE  | 289  | 5.370028 | 32667.05 | 1      | 19.4 | 4  | 5  |
| sp Q9DBP5 KCY_MOUSE   | 196  | 5.680035 | 22165.33 | 1      | 37.2 | 7  | 11 |
| sp Q9DCX2 ATP5H_MOUSE | 161  | 5.510031 | 18749.45 | 1      | 57.1 | 10 | 19 |
| sp Q9JHW2 NIT2_MOUSE  | 276  | 6.440053 | 30501.76 | 1      | 9.1  | 3  | 4  |
| sp Q9JMD3 PCTL_MOUSE  | 291  | 6.660058 | 32951.46 | 1      | 8.6  | 2  | 4  |
| sp Q9QXF8 GNMT_MOUSE  | 293  | 7.090067 | 32675.22 | 1      | 6.1  | 2  | 3  |
| sp Q9QXT0 CNPY2_MOUSE | 182  | 4.940018 | 20767.35 | 1      | 15.9 | 2  | 2  |
| sp Q9R0H0 ACOX1_MOUSE | 661  | 8.640102 | 74634.73 | 1      | 12.4 | 6  | 13 |
| sp Q9R0P3 ESTD_MOUSE  | 282  | 6.690058 | 31319.58 | 1      | 27.7 | 6  | 11 |
| sp P52760 UK114_MOUSE | 135  | 8.730104 | 14255.42 | 0.9999 | 14.8 | 2  | 2  |
| sp Q9JLV1 BAG3_MOUSE  | 577  | 6.980065 | 61828.27 | 0.9999 | 5.4  | 2  | 2  |
| sp Q91YW3 DNJC3_MOUSE | 504  | 5.600033 | 57464.1  | 0.9997 | 6    | 2  | 3  |
| sp Q921X9 PDIA5_MOUSE | 517  | 7.250071 | 59267.26 | 0.9994 | 4.1  | 2  | 3  |
| sp P31786 ACBP_MOUSE  | 87   | 8.770105 | 10000.43 | 0.9991 | 12.6 | 2  | 3  |
| sp O09167 RL21_MOUSE  | 160  | 10.48015 | 18561.83 | 0.9989 | 18.1 | 2  | 2  |
| sp O35381 AN32A_MOUSE | 247  | 3.979997 | 28537.53 | 0.9945 | 5.3  | 1  | 1  |
| sp O88668 CREG1_MOUSE | 220  | 5.960042 | 24451.87 | 0.9945 | 5    | 1  | 3  |
| sp P01132 EGF_MOUSE   | 1217 | 6.050044 | 133144.3 | 0.9945 | 2.1  | 1  | 1  |
| sp P02089 HBB2_MOUSE  | 147  | 7.840085 | 15878.25 | 0.9945 | 12.9 | 1  | 3  |
| sp P14206 RSSA_MOUSE  | 295  | 4.790015 | 32838.08 | 0.9945 | 4.4  | 1  | 2  |
| sp P17751 TPIS_MOUSE  | 249  | 6.890063 | 26712.62 | 0.9945 | 6    | 1  | 1  |
| sp P21614 VTDB_MOUSE  | 476  | 5.380028 | 53600.41 | 0.9945 | 5.5  | 1  | 1  |
| sp P21619 LMNB2_MOUSE | 596  | 5.400029 | 67318.12 | 0.9945 | 3.5  | 1  | 1  |
| sp P28667 MRP_MOUSE   | 200  | 4.620011 | 20165.43 | 0.9945 | 7.5  | 1  | 1  |
| sp P31725 S10A9_MOUSE | 113  | 6.640057 | 13048.85 | 0.9945 | 10.6 | 1  | 3  |
| sp P36552 HEM6_MOUSE  | 443  | 8.800106 | 49714.58 | 0.9945 | 2.9  | 1  | 2  |
| sp P50247 SAHH_MOUSE  | 432  | 6.080044 | 47688.21 | 0.9945 | 2.5  | 1  | 1  |
| sp P62962 PROF1_MOUSE | 140  | 8.460098 | 14957.21 | 0.9945 | 10   | 1  | 2  |
| sp P68037 UB2L3_MOUSE | 154  | 8.670103 | 17861.58 | 0.9945 | 14.3 | 1  | 2  |
| sp Q4VAA2 CDV3_MOUSE  | 281  | 5.830039 | 29729.02 | 0.9945 | 10.7 | 1  | 1  |
| sp Q59J78 MIMIT_MOUSE | 168  | 7.860085 | 19627.85 | 0.9945 | 10.7 | 1  | 1  |
| sp Q62048 PEA15_MOUSE | 130  | 4.940018 | 15054.12 | 0.9945 | 7.7  | 1  | 2  |
| sp Q80XN0 BDH_MOUSE   | 343  | 9.140114 | 38284.98 | 0.9945 | 5.8  | 1  | 2  |
| sp Q8BG05 ROA3_MOUSE  | 379  | 9.090113 | 39652    | 0.9945 | 5.8  | 1  | 3  |
| sp Q8BH00 AL8A1_MOUSE | 487  | 7.490077 | 53663.96 | 0.9945 | 2.5  | 1  | 1  |
| sp Q8BWT1 THIM_MOUSE  | 397  | 8.320095 | 41857.93 | 0.9945 | 6.5  | 1  | 1  |
| sp Q8CHT0 AL4A1_MOUSE | 562  | 8.580101 | 61810.59 | 0.9945 | 2    | 1  | 2  |
| sp Q8R086 SUOX_MOUSE  | 546  | 6.060044 | 60755.93 | 0.9945 | 5.5  | 1  | 1  |
| sp Q8VDD5 MYH9_MOUSE  | 1960 | 5.540032 | 226370.1 | 0.9945 | 0.9  | 1  | 1  |

|                       |      |          |          |        |      |    |    |
|-----------------------|------|----------|----------|--------|------|----|----|
| sp Q8VE95 CH082_MOUSE | 218  | 8.99011  | 24329.83 | 0.9945 | 5.5  | 1  | 1  |
| sp Q8VIJ6 SFPQ_MOUSE  | 699  | 9.450121 | 75441.9  | 0.9945 | 2.1  | 1  | 2  |
| sp Q920E5 FPPS_MOUSE  | 353  | 5.480031 | 40581.56 | 0.9945 | 4    | 1  | 2  |
| sp Q9CXI5 ARMET_MOUSE | 179  | 8.340096 | 20373.68 | 0.9945 | 8.4  | 1  | 3  |
| sp Q9D0S9 HINT2_MOUSE | 163  | 9.83013  | 17320.03 | 0.9945 | 12.3 | 1  | 2  |
| sp Q9DCS2 CP013_MOUSE | 204  | 6.090044 | 22687.15 | 0.9945 | 8.8  | 1  | 2  |
| sp Q9JHI5 IVD_MOUSE   | 424  | 8.5201   | 46325.41 | 0.9945 | 2.6  | 1  | 4  |
| sp Q9Z2M7 PMM2_MOUSE  | 242  | 6.010043 | 27656.62 | 0.9945 | 5.4  | 1  | 2  |
| sp Q9CR51 VATG1_MOUSE | 118  | 7.760083 | 13724.4  | 0.9939 | 9.3  | 1  | 2  |
| sp Q64471 GSTT1_MOUSE | 240  | 6.790061 | 27376.25 | 0.9923 | 4.6  | 1  | 1  |
| sp P13634 CAH1_MOUSE  | 261  | 6.440053 | 28320.52 | 0.9912 | 3.8  | 1  | 2  |
| sp P16460 ASSY_MOUSE  | 412  | 8.350096 | 46584.52 | 0.9912 | 5.6  | 1  | 1  |
| sp O88569 ROA2_MOUSE  | 353  | 8.97011  | 37402.68 | 0.9901 | 4.2  | 1  | 2  |
| sp Q9WVA2 TIM8A_MOUSE | 97   | 5.100022 | 11042.44 | 0.9879 | 11.3 | 1  | 2  |
| sp O35972 RM23_MOUSE  | 146  | 9.760128 | 17121.62 | 0.9874 | 10.3 | 1  | 2  |
| sp O35737 HNRH1_MOUSE | 449  | 5.88004  | 49199.43 | 0.9868 | 4.1  | 1  | 1  |
| sp Q99PG2 OGFR_MOUSE  | 633  | 4.650012 | 70679.41 | 0.9831 | 1.9  | 1  | 1  |
| sp P63325 RS10_MOUSE  | 165  | 10.15014 | 18915.75 | 0.9815 | 5.5  | 1  | 3  |
| sp P62806 H4_MOUSE    | 103  | 11.36017 | 11367.34 | 0.9761 | 11.7 | 1  | 3  |
| sp P62991 UBIQ_MOUSE  | 76   | 6.560055 | 8564.843 | 0.9719 | 11.8 | 1  | 2  |
| sp P05202 AATM_MOUSE  | 430  | 9.120113 | 47411.4  | 0.9713 | 2.8  | 1  | 3  |
| sp P15532 NDKA_MOUSE  | 152  | 6.840062 | 17207.79 | 0.9703 | 7.9  | 1  | 2  |
| sp P16858 G3P_MOUSE   | 333  | 8.430098 | 35810.03 | 0.9692 | 4.5  | 1  | 1  |
| sp Q9CZL5 PHS2_MOUSE  | 103  | 6.270049 | 11740.28 | 0.9692 | 9.7  | 1  | 2  |
| sp P61957 SUMO2_MOUSE | 95   | 5.310027 | 10871.22 | 0.9676 | 12.6 | 1  | 2  |
| sp Q9EQU5 SET_MOUSE   | 289  | 4.220002 | 33377.77 | 0.9671 | 4.5  | 1  | 1  |
| sp Q80Y14 GLRX5_MOUSE | 152  | 6.090044 | 16292.49 | 0.9656 | 9.2  | 1  | 2  |
| sp P27546 MAP4_MOUSE  | 1125 | 4.890017 | 117429.1 | 0.9635 | 1.2  | 1  | 1  |
| sp Q9DAR7 DCPS_MOUSE  | 338  | 6.020043 | 38988.21 | 0.9593 | 5.6  | 1  | 2  |
| sp Q9CQI6 COTL1_MOUSE | 142  | 5.270026 | 15943.91 | 0.9578 | 11.3 | 1  | 1  |
| sp Q8BTM8 FLNA_MOUSE  | 2647 | 5.680035 | 281191   | 0.9501 | 1    | 1  | 1  |
| sp O35490 BHMT1_MOUSE | 407  | 8.010088 | 45020.53 | 1      | 22.9 | 8  | 18 |
| sp P01942 HBA_MOUSE   | 142  | 7.960087 | 15085.17 | 1      | 67.6 | 15 | 52 |
| sp P05366 SAA1_MOUSE  | 122  | 6.500054 | 13770.28 | 1      | 15.6 | 2  | 4  |
| sp P10649 GSTM1_MOUSE | 218  | 7.710082 | 25969.98 | 0.9999 | 12.8 | 2  | 3  |
| sp P58771 TPM1_MOUSE  | 284  | 4.680012 | 32680.54 | 0.9995 | 16.2 | 3  | 5  |
| sp Q6IRU2 TPM4_MOUSE  | 248  | 4.640011 | 28467.71 | 0.9994 | 11.3 | 1  | 1  |
| sp P21107 TPM3_MOUSE  | 284  | 4.680012 | 32862.82 | 0.9861 | 16.2 | 1  | 1  |
| sp P70694 DHB5_MOUSE  | 323  | 8.490099 | 37047.68 | 1      | 15.2 | 4  | 5  |
| sp Q91Y97 ALDOB_MOUSE | 364  | 8.5201   | 39506.98 | 1      | 33   | 16 | 30 |
| sp Q922U2 K2C5_MOUSE  | 580  | 7.580079 | 61766.7  | 1      | 5.5  | 3  | 7  |
| sp Q61414 K1C15_MOUSE | 452  | 4.780015 | 49137.58 | 0.9996 | 4    | 2  | 2  |
| sp P60710 ACTB_MOUSE  | 375  | 5.290026 | 41736.76 | 0.9992 | 5.6  | 2  | 3  |
